# Supplementary material
Source: ML conference proceedings conference paper supplement (https://openaccess.thecvf.com/content/ICCV2023/html/Chen_Dual_Aggregation_Transformer_ICCV_2023_paper.html)
Supplement: Supplementary file 1 [file Chen_Dual_Aggregation_Transformer_ICCV_2023_supplemental.pdf]

# Supplementary Material: Dual Aggregation Transformer for Image Super-Resolution

Zheng Chen<sup>1</sup>, Yulun Zhang<sup>2\*</sup>, Jinjin Gu<sup>3,4</sup>, Linghe Kong<sup>1\*</sup>, Xiaokang Yang<sup>1</sup>, Fisher Yu<sup>2</sup>

<sup>1</sup>Shanghai Jiao Tong University, <sup>2</sup>ETH Zürich, <sup>3</sup>Shanghai AI Laboratory, <sup>4</sup>The University of Sydney

## Overview

The supplementary material is organized as follows. In Sec. 1, we provide more discussions about AIM. Sec. 2 provides more versions of DAT. In Sec. 3, we provide further analyses, investigating the advantages of aggregating channel and spatial information. Sec. 4, we conduct experiments on the recent state-of-the-art method ELAN for fair comparisons with our method. Sec. 5 and Sec. 6 provide more quantitative and visual comparisons. Finally, in Sec. 7, we discuss the limitation and future work of our method.

## 1. More Discussions about AIM

**Firstly**, we further explain the motivation of the AIM. **Then**, we describe the design considerations of spatial-interaction (S-I) and channel-interaction (C-I) of AIM.

### 1.1. Motivation

In general, AIM is proposed to enhance the fusion of depth-wise convolution (DW-Conv) and self-attention (SA) branches, and to aggregate spatial and channel information in a single SA module. **Firstly**, considering the misalignment between local (DW-Conv) and global (SA) features [18, 24], the two branches cannot be fused effectively. **Secondly**, SA applies a weight-sharing mechanism, limiting its feature learning in shared dimensions [8, 3]. As shown in Fig. 1, SW-SA applies the same spatial attention map (dynamic weights, from the dot-product between *query* and *key*) to each channel, namely, sharing weights on channel dimensions. Similarly, CW-SA shares weights on spatial dimensions. Since weight sharing, a single SA module cannot effectively aggregate both spatial and channel dimensions. **Finally**, to alleviate above issues, we adaptively adjust features through dynamic weights. Meanwhile, considering the parallel structure, the dynamic weights are generated from interactions between two branches.

### 1.2. Design Considerations

To realize the above purpose, we propose AIM, which consists of spatial-interaction (S-I) and channel-interaction

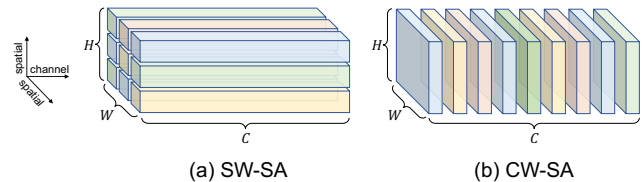

Figure 1: Illustration of the weight sharing mechanism. (a) SW-SA shares attention weights on the channel dimensions (same color along the channel dimension). (b) CW-SA shares attention weights on spatial dimensions (same color along the spatial dimension). For simplification, we depict the case that the attention is single-head. The feature size ( $H \times W \times C$ ) here is  $3 \times 3 \times 9$ .

(C-I). Specifically, we first introduce interaction from DW-Conv to SA. **For SW-SA**, as the above analysis, we generate a channel attention map (C-Map) to adjust channel dimension. **For CW-SA**, we generate a spatial attention map (S-Map). For C-I, we follow the design of the SE layer [10]. For S-I, considering that the convolution branch already extracts spatial information, we only utilize  $1 \times 1$  convolution to compress the channel dimension without explicitly modeling spatial information in S-I.

Furthermore, from the perspective of duality, we also introduce interaction from SA to DW-Conv. Since SW-SA extracts strong spatial information, we utilize S-I to transfer it to the corresponding DW-Conv branch. Similarly, we apply C-I in CW-SA to strengthen the channel expression of convolution. Synthesizing the above designs, we propose the AIM to enhance branch fusion and achieve feature aggregation. The ablation study in Table 1(b, c) in the main paper demonstrates the effectiveness of our AIM.

## 2. More DAT Variants

In this section, we provide more versions of DAT to demonstrate the effectiveness of our proposed method. **Firstly**, we provide DAT-2 with fewer Params (model parameters) and similar FLOPs (computational complexity) to SwinIR [13]. **Secondly**, we provide a light-weight model, DAT-light, for light-weight image SR. **Finally**, we provide DAT-3 with the same window size ( $8 \times 8$ ) as SwinIR.

\*Corresponding authors: Yulun Zhang, yulun100@gmail.com; Linghe Kong, linghe.kong@sjtu.edu.cn

| Method      | Scale      | Params | FLOPs   | Set5         |               | Set14        |               | B100         |               | Urban100     |               | Manga109     |               |
|-------------|------------|--------|---------|--------------|---------------|--------------|---------------|--------------|---------------|--------------|---------------|--------------|---------------|
|             |            |        |         | PSNR         | SSIM          |
| SwinIR [13] | $\times 2$ | 11.75M | 205.31G | 38.42        | 0.9623        | 34.46        | 0.9250        | 32.53        | 0.9041        | 33.81        | 0.9427        | 39.92        | 0.9797        |
| DAT-2       | $\times 2$ | 11.06M | 206.93G | <b>38.58</b> | <b>0.9627</b> | <b>34.78</b> | <b>0.9268</b> | <b>32.60</b> | <b>0.9050</b> | <b>34.31</b> | <b>0.9457</b> | <b>40.29</b> | <b>0.9806</b> |
| SwinIR [13] | $\times 3$ | 11.94M | 208.48G | 34.97        | 0.9318        | 30.93        | 0.8534        | 29.46        | 0.8145        | 29.75        | 0.8826        | 35.12        | 0.9537        |
| DAT-2       | $\times 3$ | 11.25M | 210.09G | <b>35.14</b> | <b>0.9328</b> | <b>31.06</b> | <b>0.8547</b> | <b>29.53</b> | <b>0.8161</b> | <b>30.13</b> | <b>0.8878</b> | <b>35.49</b> | <b>0.9550</b> |
| SwinIR [13] | $\times 4$ | 11.90M | 215.32G | 32.92        | 0.9044        | 29.09        | 0.7950        | 27.92        | 0.7489        | 27.45        | 0.8254        | 32.03        | 0.9260        |
| DAT-2       | $\times 4$ | 11.21M | 216.93G | <b>33.01</b> | <b>0.9047</b> | <b>29.21</b> | <b>0.7965</b> | <b>27.98</b> | <b>0.7509</b> | <b>27.86</b> | <b>0.8341</b> | <b>32.41</b> | <b>0.9285</b> |

Table 1: Quantitative comparison (PSNR/SSIM) between DAT-2 and SwinIR [13]. The input size is  $3 \times 128 \times 128$  to calculate FLOPs.

| Method            | Scale      | Params | FLOPs   | Set5         |               | Set14        |               | B100         |               | Urban100     |               | Manga109     |               |
|-------------------|------------|--------|---------|--------------|---------------|--------------|---------------|--------------|---------------|--------------|---------------|--------------|---------------|
|                   |            |        |         | PSNR         | SSIM          |
| SwinIR-light [13] | $\times 2$ | 910K   | 244.37G | 38.14        | 0.9611        | 33.86        | 0.9206        | 32.31        | 0.9012        | 32.76        | 0.9340        | 39.12        | 0.9783        |
| ELAN-light [29]   | $\times 2$ | 621K   | 201.34G | 38.17        | 0.9611        | 33.94        | 0.9207        | 32.30        | 0.9012        | 32.76        | 0.9340        | 39.11        | 0.9782        |
| DAT-light         | $\times 2$ | 553K   | 194.26G | <b>38.24</b> | <b>0.9614</b> | <b>34.01</b> | <b>0.9214</b> | <b>32.34</b> | <b>0.9019</b> | <b>32.89</b> | <b>0.9346</b> | <b>39.49</b> | <b>0.9788</b> |
| SwinIR-light [13] | $\times 3$ | 930K   | 110.80G | 34.62        | 0.9289        | 30.54        | 0.8463        | 29.20        | 0.8082        | 28.66        | 0.8624        | 33.98        | 0.9478        |
| ELAN-light [29]   | $\times 3$ | 629K   | 89.48G  | 34.61        | 0.9288        | 30.55        | 0.8463        | 29.21        | 0.8081        | 28.69        | 0.8624        | 34.00        | 0.9478        |
| DAT-light         | $\times 3$ | 561K   | 88.59G  | <b>34.76</b> | <b>0.9299</b> | <b>30.63</b> | <b>0.8474</b> | <b>29.29</b> | <b>0.8103</b> | <b>28.89</b> | <b>0.8666</b> | <b>34.55</b> | <b>0.9501</b> |
| SwinIR-light [13] | $\times 4$ | 930K   | 63.59G  | 32.44        | 0.8976        | 28.77        | 0.7858        | 27.69        | 0.7406        | 26.47        | 0.7980        | 30.92        | 0.9151        |
| ELAN-light [29]   | $\times 4$ | 640K   | 53.72G  | 32.43        | 0.8975        | 28.78        | 0.7858        | 27.69        | 0.7406        | 26.54        | 0.7982        | 30.92        | 0.9150        |
| DAT-light         | $\times 4$ | 573K   | 49.69G  | <b>32.57</b> | <b>0.8991</b> | <b>28.87</b> | <b>0.7879</b> | <b>27.74</b> | <b>0.7428</b> | <b>26.64</b> | <b>0.8033</b> | <b>31.37</b> | <b>0.9178</b> |

Table 2: Quantitative comparison (PSNR/SSIM) for lightweight image SR. Output size is  $3 \times 1280 \times 720$  to calculate FLOPs. We re-test the Params and FLOPs with all official codes on SwinIR and ELAN.

| Method      | Scale      | Params | FLOPs   | Set5         |               | Set14        |               | B100         |               | Urban100     |               | Manga109     |               |
|-------------|------------|--------|---------|--------------|---------------|--------------|---------------|--------------|---------------|--------------|---------------|--------------|---------------|
|             |            |        |         | PSNR         | SSIM          |
| SwinIR [13] | $\times 2$ | 11.75M | 205.31G | 38.42        | 0.9623        | 34.46        | 0.9250        | 32.53        | 0.9041        | 33.81        | <b>0.9427</b> | 39.92        | 0.9797        |
| DAT-3       | $\times 2$ | 11.06M | 186.54G | <b>38.52</b> | <b>0.9626</b> | <b>34.58</b> | <b>0.9261</b> | <b>32.54</b> | <b>0.9043</b> | <b>33.86</b> | 0.9424        | <b>40.12</b> | <b>0.9804</b> |

Table 3: Quantitative comparison (PSNR/SSIM) between DAT-3 and SwinIR [13] ( $\times 2$ ). The input size is  $3 \times 128 \times 128$  to calculate FLOPs.

## 2.1. Another Model: DAT-2

**Implementation details.** We provide another model variant of DAT: DAT-2. We set the residual group (RG) number, dual aggregation Transformer block (DATB) pair number, channel number, attention head number, and channel expansion factor as 6, 3, 180, 6, and 2, respectively. We set the window size as  $8 \times 32$  for DAT-2.

**Training Settings.** We train DAT-2 on DIV2K [25] and Flickr2K [14]. We use five datasets for evaluation: Set5 [1], Set14 [26], B100 [19], Urban100 [11], and Manga109 [20] with three factors:  $\times 2$ ,  $\times 3$ , and  $\times 4$ . The training settings are consistent with DAT-S and DAT.

**Quantitative Results.** We compare our DAT-2 with SwinIR [13]. The results are listed in Table 1. FLOPs are calculated when the input size is set as  $3 \times 128 \times 128$  for three scale factors. As we can see, our DAT-2 outperforms SwinIR on all datasets with all scale factors. Specially, our DAT-2 achieves 0.5 dB and 0.37 dB gains on Urban100 and Manga109 ( $\times 2$ ), respectively. Meanwhile, DAT-2 has fewer Params and similar FLOPs to SwinIR.

## 2.2. Light-weight Model: DAT-light

**Implementation details.** We provide a light-weight model, DAT-light, for light-weight image SR. DAT-light only has 1 RG and 9 DATB pairs (9 DCTB and 9 DSTB). The channel

number, attention head number, and channel expansion factor are set as 60, 6, and 2, respectively. The window size for DSTB is set as  $8 \times 32$ .

**Training Settings.** We train DAT-light on DIV2K [25] and Flickr2K [14], and test it on Set5 [1], Set14 [26], B100 [19], Urban100 [11], and Manga109 [20]. The training settings are consistent with DAT-S and DAT.

**Quantitative Results.** We compare our DAT-light with recent state-of-the-art lightweight methods: SwinIR [13] and ELAN [29], in Table 2. FLOPs are calculated when the output size is set as  $3 \times 1280 \times 720$  for three scale factors. Please note that we re-test the Params and FLOPs of SwinIR and ELAN with their official codes. Our DAT-light achieves better performance with fewer Params and FLOPs for all scale factors, compared with SwinIR and ELAN.

## 2.3. $8 \times 8$ Window Size Model: DAT-3

**Implementation details.** We provide DAT-3 with a window size of  $8 \times 8$ , the same as SwinIR [13]. Specifically, we set the RG number, DATB pair number, channel number, attention head number, and channel expansion factor as 6, 3, 180, 6, and 2. The window size for DSTB is set as  $8 \times 8$ .

**Training Settings.** We train DAT-3 on DIV2K [25] and Flickr2K [14]. The training settings are consistent with DAT-S and DAT. The main paper has more details.

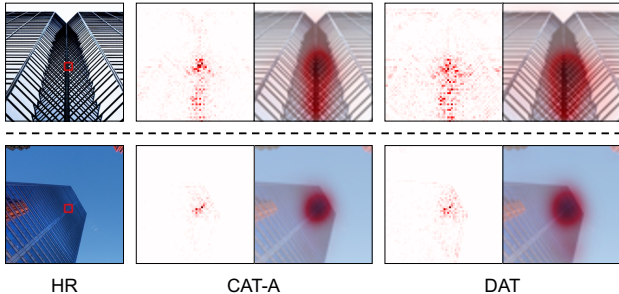

Figure 2: LAM [7] comparison between CAT-A [4] and DAT.

**Quantitative Results.** To demonstrate the effectiveness of our method, we build DAT-3 with the same window size as SwinIR [13]. Due to time issues, we only train DAT-3 on image SR ( $\times 2$ ), and compare it with SwinIR. The results are shown in Table 3. FLOPs are calculated when the output size is set as  $3 \times 128 \times 128$ . As we can see, with fewer Params and FLOPs, our DAT-3 outperforms SwinIR, except for the SSIM value on Urban100. Especially, our DAT-3 obtains a 0.2 dB PSNR gains on Manga109. All these results demonstrate the effectiveness of our methods.

### 3. Further Analyses

In this section, we provide more quantitative and visual analyses. **Firstly**, we apply the LAM [7] to visualize the range of information utilization. **Then**, we introduce several perceptual similarity metrics to evaluate our method. **Finally**, we plot the convergence curves during training for SwinIR and our models.

#### 3.1. LAM Analyses

We apply the LAM [7] to analyze the performance of our DAT. LAM is a diagnostic tool designed for image super-resolution (SR). It can show the pixels that contribute most to the reconstruction of the selected region. The corresponding pixels are marked as red in related images. More marked pixels mean the model can utilize more information, thus resulting in better performance. Fig. 2 shows the LAM comparisons between CAT-A [4] and DAT. Comparing the second and fourth columns, we can find that the number of red marker points of our DAT is more than CAT-A. It indicates that our DAT has larger receptive fields and utilizes more global information to restore images. This is because our method has a stronger representation ability through aggregating spatial and channel features.

#### 3.2. Perceptual Similarity Analyses

In the main paper, we quantitatively compare our method with current methods using metrics: PSNR/SSIM. However, the literature [2] reveals that the superiority of PSNR values does not always accord with better visual quality. Moreover, we also found that compared to CAT-A, our DAT has a lower PSNR value on Urban100 ( $\times 4$ ), but has better

| Method      | Scale      | Urban100      |               | Manga109      |               |
|-------------|------------|---------------|---------------|---------------|---------------|
|             |            | LPIPS ↓       | DISTS ↓       | LPIPS ↓       | DISTS ↓       |
| SwinIR [13] | $\times 4$ | 0.1840        | 0.1533        | 0.0926        | 0.0766        |
| CAT-A [4]   | $\times 4$ | 0.1801        | 0.1502        | 0.0906        | 0.0753        |
| DAT (ours)  | $\times 4$ | <b>0.1765</b> | <b>0.1487</b> | <b>0.0896</b> | <b>0.0735</b> |

Table 4: Perceptual Similarity (LPIPS/DISTS) Comparison.

visual results. To further evaluate our methods, we introduce two metrics: LPIPS [28] and DISTS [6]. Compared with PSNR, LPIPS and DISTS align more with human perception. The lower the value of LPIPS and DISTS, the more similar the two images. We compare our DAT with SwinIR and CAT-A on Urban100 and Manga109 with a scale factor of  $\times 4$ . The results are listed in Table 4. Our DAT achieves the best performance (lowest value) on both datasets. This result demonstrates the superiority of our method. It is also consistent with the visual comparison in Figs. 4 and 5.

### 3.3. Convergence Analyses

The convergence curves for SwinIR, DAT-S, and DAT are shown in Fig. 3. PSNR values are tested on Set5 [1], Set14 [26], B100 [19], Urban100 [11], and Manga109 [20] ( $\times 2$ ). For fair comparisons, we train SwinIR under the official code with the same training settings as our methods. The total training iterations are  $5 \times 10^5$ . We sample every  $5 \times 10^3$  iterations on Set5, while every  $5 \times 10^4$  iterations on other datasets. We can observe that both DAT-S and DAT converge faster than SwinIR on all datasets. These results are in accord with quantitative comparisons in Table 6, further demonstrating the effectiveness of our method.

## 4. Recent Method: ELAN

Recently, Zhang *et al.* [29] proposed a new image SR Transformer model, named efficient long-range attention network (ELAN). ELAN improves the efficiency of Transformer in SR tasks and outperforms SwinIR [13] in some cases. However, ELAN is trained on DIV2K [25], while our DAT-S and DAT are on DIV2K and Flickr2K [14]. Meanwhile, the model size and computational complexity of ELAN are smaller than our model. For fair comparisons, we increase the efficient long-range attention block (ELAB) number in ELAN, thus constructing a new variant of ELAN, denoted as ELAN-2. Then we re-train ELAN and ELAN-2 on DIV2K and Flickr2K.

### 4.1. Experimental Settings

**Implementation Details.** For ELAN, we adopt the settings in the official paper [29]. Specifically, the ELAB number is 36, and the channel number is 180. The GMSA module contains three window sizes:  $4 \times 4$ ,  $8 \times 8$ , and  $16 \times 16$ . For ELAN-2, we only increase the ELAB number from 36 to 48, while other settings are the same as ELAN.

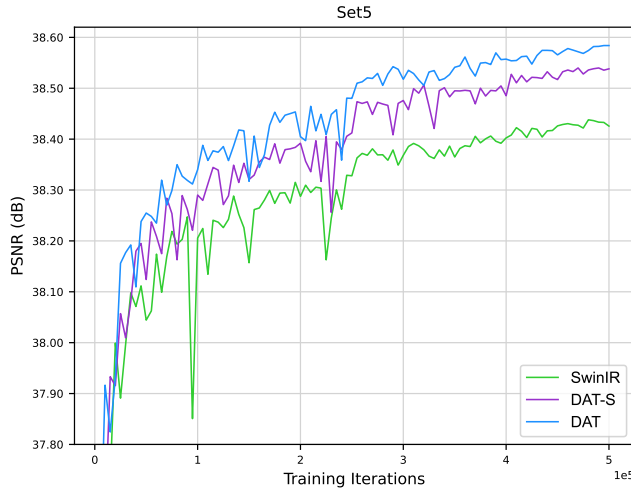(a) Sampled every  $5 \times 10^3$  iterations.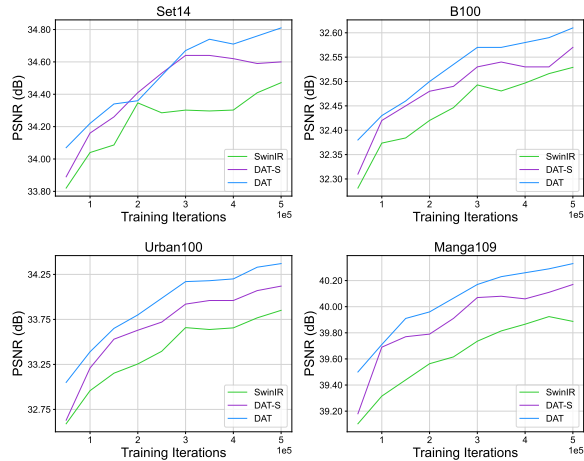(d) Sampled every  $5 \times 10^4$  iterations.

Figure 3: Convergence comparison on SwinIR [13], DAT-S, and DAT.

| Method       | Training Dataset | Params | FLOPs   | Set5         |               | Set14        |               | B100         |               | Urban100     |               | Manga109     |               |
|--------------|------------------|--------|---------|--------------|---------------|--------------|---------------|--------------|---------------|--------------|---------------|--------------|---------------|
|              |                  |        |         | PSNR         | SSIM          |
| ELAN [29]    | DIV2K            | 8.43M  | 161.24G | 38.36        | 0.9620        | 34.20        | 0.9228        | 32.45        | 0.9030        | 33.44        | 0.9391        | 39.62        | 0.9793        |
| ELAN* [29]   | DIV2K+Flicker2K  | 8.43M  | 161.24G | 38.38        | 0.9619        | 34.41        | 0.9247        | 32.48        | 0.9035        | 33.54        | 0.9410        | 39.74        | 0.9795        |
| ELAN-2* [29] | DIV2K+Flicker2K  | 11.23M | 214.86G | 38.44        | 0.9623        | 34.43        | 0.9245        | 32.51        | 0.9040        | 33.76        | 0.9423        | 39.90        | 0.9800        |
| SwinIR [13]  | DIV2K+Flicker2K  | 11.75M | 205.31G | 38.42        | 0.9623        | 34.46        | 0.9250        | 32.53        | 0.9041        | 33.81        | 0.9427        | 39.92        | 0.9797        |
| DAT-S (ours) | DIV2K+Flicker2K  | 11.06M | 193.34G | <b>38.54</b> | <b>0.9627</b> | <b>34.60</b> | <b>0.9258</b> | <b>32.57</b> | <b>0.9047</b> | <b>34.12</b> | <b>0.9444</b> | <b>40.17</b> | <b>0.9804</b> |

Table 5: Quantitative comparison ( $\times 2$ ) about variants of ELAN [29], SwinIR [13], and our DAT-S. The input size is  $3 \times 128 \times 128$  to calculate FLOPs. “\*” indicates that we re-train the model on DIV2K [25] and Flickr2K [14].

**Training Settings.** We re-train ELAN and ELAN-2 on DIV2K [25] and Flickr2K [14] with the official code. We train two models with patch size  $64 \times 64$  and batch size 32. Following the training details in the official paper [29], we use Adam optimizer with  $\beta_1=0.9$ ,  $\beta_2=0.999$ , and  $\epsilon=10^{-8}$ . The total training epochs are 500. The initial learning rate is set as  $2 \times 10^{-4}$  and reduced by half at epochs [250,400,425,450,475]. Moreover, we adopt random rotation and flips for data augmentation.

## 4.2. Model Comparisons

We compare re-trained ELAN and ELAN-2 with official ELAN [29], SwinIR [13], and our DAT-S on five benchmark datasets: Set5 [1], Set14 [26], B100 [19], Urban100 [11], and Manga109 [20] with scale factor  $\times 2$ . The performance (PSNR/SSIM), parameters, and FLOPs are reported. FLOPs are calculated when the input size is  $3 \times 128 \times 128$ . The results are listed in Table 5. We can observe that using DIV2K and Flickr2K to train ELAN can improve the performance of the model. Compared with training on DIV2K, ELAN obtains 0.1 dB and 0.12 dB gains on Urban100 and Manga109. Meanwhile, increasing the number of efficient long-range attention blocks in ELAN can also advance performance. Furthermore, comparing ELAN-2, SwinIR, and

our DAT-S, we can find that our DAT-S outperforms the other two models with fewer parameters and FLOPs. Especially the three models are trained on the same dataset.

## 5. More Quantitative Results

We compare our models: DAT-S, DAT-2, and DAT, with state-of-the-art methods: EDSR [14], SRMDNF [27], RDN [32], OISR [9], RCAN [30], NLRN [15], RNAN [31], SRFBN [12], SAN [5], RFANet [16], IGNN [34], HAN [23], CSNLN [22], NLSA [21], CRAN [33], ELAN [29], DFSA [17], SwinIR [13], and CAT-A [4]. We use self-ensemble strategy in testing and mark the model with a symbol “+”. Quantitative results are shown in Table 6. Our DAT outperforms other methods in all cases, except for the PSNR value (CAT-A) on Urban100 ( $\times 4$ ). Additionally, our DAT-S and DAT-2 achieve comparable or better performance than previous methods.

## 6. More Visual Results

We provide more visual comparisons in Figs. 4 and 5 as the supplement of the visualization in the main paper. As we can see, most compared methods suffer from blurring artifacts and cannot recover some details in some challenging

cases. In contrast, our DAT can alleviate the blurring artifact to some degree and recover sharp textures. For instance, in `img_021`, our DAT recovers more textures and patterns than other methods. Similar observations are shown in other images. These visual comparisons further demonstrate that our method has powerful modeling capability by aggregating spatial and channel features.

## 7. Limitations and Future Work

In this work, we propose the dual aggregation Transformer (DAT), for image SR. Our DAT can aggregate spatial and channel information via the inter-block and intra-block manner, thus obtaining powerful representation ability. Our DAT outperforms recent state-of-the-art image SR methods. Nevertheless, we for more types of image SR tasks (*e.g.*, blind and real-world image SR), we have not explored. We will apply our DAT to more kinds of image SR tasks in the future to further demonstrate the effectiveness of our proposed method. In addition, we mainly focus on designing the Transformer block to aggregate spatial and channel information. For the network architecture, we have not investigated it. In future work, we will explore other network structures, such as parallel or multi-scale architectures.

## References

- [1] Marco Bevilacqua, Aline Roumy, Christine Guillemot, and Marie Line Alberi-Morel. Low-complexity single-image super-resolution based on nonnegative neighbor embedding. In *BMVC*, 2012. [2](#), [3](#), [4](#)
- [2] Yochai Blau and Tomer Michaeli. The perception-distortion tradeoff. In *CVPR*, 2018. [3](#)
- [3] Qiang Chen, Qiman Wu, Jian Wang, Qinghao Hu, Tao Hu, Errui Ding, Jian Cheng, and Jingdong Wang. Mixformer: Mixing features across windows and dimensions. In *CVPR*, 2022. [1](#)
- [4] Zheng Chen, Yulun Zhang, Jinjin Gu, Yongbing Zhang, Linghe Kong, and Xin Yuan. Cross aggregation transformer for image restoration. In *NeurIPS*, 2022. [3](#), [4](#), [7](#), [8](#), [9](#)
- [5] Tao Dai, Jianrui Cai, Yongbing Zhang, Shu-Tao Xia, and Lei Zhang. Second-order attention network for single image super-resolution. In *CVPR*, 2019. [4](#), [7](#), [8](#), [9](#)
- [6] Keyan Ding, Kede Ma, Shiqi Wang, and Eero P Simoncelli. Image quality assessment: Unifying structure and texture similarity. *TPAMI*, 2020. [3](#)
- [7] Jinjin Gu and Chao Dong. Interpreting super-resolution networks with local attribution maps. In *CVPR*, 2021. [3](#)
- [8] Qi Han, Zejia Fan, Qi Dai, Lei Sun, Ming-Ming Cheng, Jiaying Liu, and Jingdong Wang. On the connection between local attention and dynamic depth-wise convolution. In *ICLR*, 2022. [1](#)
- [9] Xiangyu He, Zitao Mo, Peisong Wang, Yang Liu, Mingyuan Yang, and Jian Cheng. Ode-inspired network design for single image super-resolution. In *CVPR*, 2019. [4](#), [7](#)
- [10] Jie Hu, Li Shen, and Gang Sun. Squeeze-and-excitation networks. In *CVPR*, 2018. [1](#)
- [11] Jia-Bin Huang, Abhishek Singh, and Narendra Ahuja. Single image super-resolution from transformed self-exemplars. In *CVPR*, 2015. [2](#), [3](#), [4](#)
- [12] Zhen Li, Jinglei Yang, Zheng Liu, Xiaomin Yang, Gwanggil Jeon, and Wei Wu. Feedback network for image super-resolution. In *CVPR*, 2019. [4](#), [7](#)
- [13] Jingyun Liang, Jie Zhang Cao, Guolei Sun, Kai Zhang, Luc Van Gool, and Radu Timofte. Swinir: Image restoration using swin transformer. In *ICCVW*, 2021. [1](#), [2](#), [3](#), [4](#), [7](#), [8](#), [9](#)
- [14] Bee Lim, Sanghyun Son, Heewon Kim, Seungjun Nah, and Kyoung Mu Lee. Enhanced deep residual networks for single image super-resolution. In *CVPRW*, 2017. [2](#), [3](#), [4](#), [7](#)
- [15] Ding Liu, Bihan Wen, Yuchen Fan, Chen Change Loy, and Thomas S Huang. Non-local recurrent network for image restoration. In *NeurIPS*, 2018. [4](#), [7](#)
- [16] Jie Liu, Wenjie Zhang, Yuting Tang, Jie Tang, and Gangshan Wu. Residual feature aggregation network for image super-resolution. In *CVPR*, 2020. [4](#), [7](#), [8](#), [9](#)
- [17] Salma Abdel Magid, Yulun Zhang, Donglai Wei, Won-Dong Jang, Zudi Lin, Yun Fu, and Hanspeter Pfister. Dynamic high-pass filtering and multi-spectral attention for image super-resolution. In *ICCV*, 2021. [4](#), [7](#)
- [18] Mingyuan Mao, Renrui Zhang, Honghui Zheng, Teli Ma, Yan Peng, Errui Ding, Baochang Zhang, Shumin Han, et al. Dual-stream network for visual recognition. In *NeurIPS*, 2021. [1](#)
- [19] David Martin, Charless Fowlkes, Doron Tal, and Jitendra Malik. A database of human segmented natural images and its application to evaluating segmentation algorithms and measuring ecological statistics. In *ICCV*, 2001. [2](#), [3](#), [4](#)
- [20] Yusuke Matsui, Kota Ito, Yuji Aramaki, Azuma Fujimoto, Toru Ogawa, Toshihiko Yamasaki, and Kiyoharu Aizawa. Sketch-based manga retrieval using manga109 dataset. *Multimedia Tools and Applications*, 2017. [2](#), [3](#), [4](#)
- [21] Yiqun Mei, Yuchen Fan, and Yuqian Zhou. Image super-resolution with non-local sparse attention. In *CVPR*, 2021. [4](#), [7](#)
- [22] Yiqun Mei, Yuchen Fan, Yuqian Zhou, Lichao Huang, Thomas S Huang, and Humphrey Shi. Image super-resolution with cross-scale non-local attention and exhaustive self-exemplars mining. In *CVPR*, 2020. [4](#), [7](#), [8](#), [9](#)
- [23] Ben Niu, Weilei Wen, Wenqi Ren, Xiangde Zhang, Lianping Yang, Shuzhen Wang, Kaihao Zhang, Xiaochun Cao, and Haifeng Shen. Single image super-resolution via a holistic attention network. In *ECCV*, 2020. [4](#), [7](#), [8](#), [9](#)
- [24] Zhiliang Peng, Wei Huang, Shanzhi Gu, Lingxi Xie, Yaowei Wang, Jianbin Jiao, and Qixiang Ye. Conformer: Local features coupling global representations for visual recognition. In *ICCV*, 2021. [1](#)
- [25] Radu Timofte, Eirikur Agustsson, Luc Van Gool, Ming-Hsuan Yang, Lei Zhang, Bee Lim, Sanghyun Son, Heewon Kim, Seungjun Nah, Kyoung Mu Lee, et al. Ntire 2017 challenge on single image super-resolution: Methods and results. In *CVPRW*, 2017. [2](#), [3](#), [4](#)
- [26] Roman Zeyde, Michael Elad, and Matan Protter. On single image scale-up using sparse-representations. In *Proc. 7th Int. Conf. Curves Surf.*, 2010. [2](#), [3](#), [4](#)

- [27] Kai Zhang, Wangmeng Zuo, and Lei Zhang. Learning a single convolutional super-resolution network for multiple degradations. In *CVPR*, 2018. 4, 7
- [28] Richard Zhang, Phillip Isola, Alexei A Efros, Eli Shechtman, and Oliver Wang. The unreasonable effectiveness of deep features as a perceptual metric. In *CVPR*, 2018. 3
- [29] Xindong Zhang, Hui Zeng, Shi Guo, and Lei Zhang. Efficient long-range attention network for image super-resolution. In *ECCV*, 2022. 2, 3, 4, 7
- [30] Yulun Zhang, Kunpeng Li, Kai Li, Lichen Wang, Bineng Zhong, and Yun Fu. Image super-resolution using very deep residual channel attention networks. In *ECCV*, 2018. 4, 7, 8, 9
- [31] Yulun Zhang, Kunpeng Li, Kai Li, Bineng Zhong, and Yun Fu. Residual non-local attention networks for image restoration. In *ICLR*, 2019. 4, 7
- [32] Yulun Zhang, Yapeng Tian, Yu Kong, Bineng Zhong, and Yun Fu. Residual dense network for image super-resolution. In *CVPR*, 2018. 4, 7
- [33] Yulun Zhang, Donglai Wei, Can Qin, Huan Wang, Hanspeter Pfister, and Yun Fu. Context reasoning attention network for image super-resolution. In *ICCV*, 2021. 4, 7
- [34] Shangchen Zhou, Jiawei Zhang, Wangmeng Zuo, and Chen Change Loy. Cross-scale internal graph neural network for image super-resolution. In *NeurIPS*, 2020. 4, 7

| Method        | Scale | Set5         |               | Set14        |               | B100         |               | Urban100     |               | Manga109     |               |
|---------------|-------|--------------|---------------|--------------|---------------|--------------|---------------|--------------|---------------|--------------|---------------|
|               |       | PSNR         | SSIM          |
| EDSR [14]     | ×2    | 38.11        | 0.9602        | 33.92        | 0.9195        | 32.32        | 0.9013        | 32.93        | 0.9351        | 39.10        | 0.9773        |
| SRMDNF [27]   | ×2    | 37.79        | 0.9601        | 33.32        | 0.9159        | 32.05        | 0.8985        | 31.33        | 0.9204        | 38.07        | 0.9761        |
| RDN [32]      | ×2    | 38.24        | 0.9614        | 34.01        | 0.9212        | 32.34        | 0.9017        | 32.89        | 0.9353        | 39.18        | 0.9780        |
| OISR [9]      | ×2    | 38.21        | 0.9612        | 33.94        | 0.9206        | 32.36        | 0.9019        | 33.03        | 0.9365        | -            | -             |
| RCAN [30]     | ×2    | 38.27        | 0.9614        | 34.12        | 0.9216        | 32.41        | 0.9027        | 33.34        | 0.9384        | 39.44        | 0.9786        |
| NLRN [15]     | ×2    | 38.00        | 0.9603        | 33.46        | 0.9159        | 32.19        | 0.8992        | 31.81        | 0.9249        | -            | -             |
| RNAN [31]     | ×2    | 38.17        | 0.9611        | 33.87        | 0.9207        | 32.31        | 0.9014        | 32.73        | 0.9340        | 39.23        | 0.9785        |
| SRFBN [12]    | ×2    | 38.11        | 0.9609        | 33.82        | 0.9196        | 32.29        | 0.9010        | 32.62        | 0.9328        | 39.08        | 0.9779        |
| SAN [5]       | ×2    | 38.31        | 0.9620        | 34.07        | 0.9213        | 32.42        | 0.9028        | 33.10        | 0.9370        | 39.32        | 0.9792        |
| RFANet [16]   | ×2    | 38.26        | 0.9615        | 34.16        | 0.9220        | 32.41        | 0.9026        | 33.33        | 0.9389        | 39.44        | 0.9783        |
| IGNN [34]     | ×2    | 38.24        | 0.9613        | 34.07        | 0.9217        | 32.41        | 0.9025        | 33.23        | 0.9383        | 39.35        | 0.9786        |
| HAN [23]      | ×2    | 38.27        | 0.9614        | 34.16        | 0.9217        | 32.41        | 0.9027        | 33.35        | 0.9385        | 39.46        | 0.9785        |
| CSNLN [22]    | ×2    | 38.28        | 0.9616        | 34.12        | 0.9223        | 32.40        | 0.9024        | 33.25        | 0.9386        | 39.37        | 0.9785        |
| NLSA [21]     | ×2    | 38.34        | 0.9618        | 34.08        | 0.9231        | 32.43        | 0.9027        | 33.42        | 0.9394        | 39.59        | 0.9789        |
| CRAN [33]     | ×2    | 38.31        | 0.9617        | 34.22        | 0.9232        | 32.44        | 0.9029        | 33.43        | 0.9394        | 39.75        | 0.9793        |
| ELAN [29]     | ×2    | 38.36        | 0.9620        | 34.20        | 0.9228        | 32.45        | 0.9030        | 33.44        | 0.9391        | 39.62        | 0.9793        |
| DFSA [17]     | ×2    | 38.38        | 0.9620        | 34.33        | 0.9232        | 32.50        | 0.9036        | 33.66        | 0.9412        | 39.98        | 0.9798        |
| SwinIR [13]   | ×2    | 38.42        | 0.9623        | 34.46        | 0.9250        | 32.53        | 0.9041        | 33.81        | 0.9427        | 39.92        | 0.9797        |
| CAT-A [4]     | ×2    | 38.51        | 0.9626        | 34.78        | 0.9265        | 32.59        | 0.9047        | 34.26        | 0.9440        | 40.10        | 0.9805        |
| DAT-S (ours)  | ×2    | 38.54        | 0.9627        | 34.60        | 0.9258        | 32.57        | 0.9047        | 34.12        | 0.9444        | 40.17        | 0.9804        |
| DAT-2 (ours)  | ×2    | 38.58        | 0.9627        | 34.78        | 0.9268        | 32.60        | 0.9050        | 34.31        | 0.9457        | 40.29        | 0.9806        |
| DAT (ours)    | ×2    | 38.58        | 0.9629        | 34.81        | 0.9272        | 32.61        | 0.9051        | 34.37        | 0.9458        | 40.33        | 0.9807        |
| DAT-S+ (ours) | ×2    | 38.57        | 0.9627        | 34.72        | 0.9267        | 32.60        | 0.9049        | 34.25        | 0.9451        | 40.26        | 0.9807        |
| DAT-2+ (ours) | ×2    | <b>38.61</b> | <b>0.9629</b> | <b>34.81</b> | <b>0.9271</b> | <b>32.62</b> | <b>0.9052</b> | <b>34.44</b> | <b>0.9463</b> | <b>40.38</b> | <b>0.9808</b> |
| DAT+ (ours)   | ×2    | <b>38.63</b> | <b>0.9631</b> | <b>34.86</b> | <b>0.9274</b> | <b>32.63</b> | <b>0.9053</b> | <b>34.47</b> | <b>0.9465</b> | <b>40.43</b> | <b>0.9809</b> |
| EDSR [14]     | ×3    | 34.65        | 0.9280        | 30.52        | 0.8462        | 29.25        | 0.8093        | 28.80        | 0.8653        | 34.17        | 0.9476        |
| SRMDNF [27]   | ×3    | 34.12        | 0.9254        | 30.04        | 0.8382        | 28.97        | 0.8025        | 27.57        | 0.8398        | 33.00        | 0.9403        |
| RDN [32]      | ×3    | 34.71        | 0.9296        | 30.57        | 0.8468        | 29.26        | 0.8093        | 28.80        | 0.8653        | 34.13        | 0.9484        |
| OISR [9]      | ×3    | 34.72        | 0.9297        | 30.57        | 0.8470        | 29.29        | 0.8103        | 28.95        | 0.8680        | -            | -             |
| RCAN [30]     | ×3    | 34.74        | 0.9299        | 30.65        | 0.8482        | 29.32        | 0.8111        | 29.09        | 0.8702        | 34.44        | 0.9499        |
| NLRN [15]     | ×3    | 34.27        | 0.9266        | 30.16        | 0.8374        | 29.06        | 0.8026        | 27.93        | 0.8453        | -            | -             |
| RNAN [31]     | ×3    | 34.66        | 0.9290        | 30.53        | 0.8463        | 29.26        | 0.8090        | 28.75        | 0.8646        | 34.25        | 0.9483        |
| SRFBN [12]    | ×3    | 34.70        | 0.9292        | 30.51        | 0.8461        | 29.24        | 0.8084        | 28.73        | 0.8641        | 34.18        | 0.9481        |
| SAN [5]       | ×3    | 34.75        | 0.9300        | 30.59        | 0.8476        | 29.33        | 0.8112        | 28.93        | 0.8671        | 34.30        | 0.9494        |
| RFANet [16]   | ×3    | 34.79        | 0.9300        | 30.67        | 0.8487        | 29.34        | 0.8115        | 29.15        | 0.8720        | 34.59        | 0.9506        |
| IGNN [34]     | ×3    | 34.72        | 0.9298        | 30.66        | 0.8484        | 29.31        | 0.8105        | 29.03        | 0.8696        | 34.39        | 0.9496        |
| HAN [23]      | ×3    | 34.75        | 0.9299        | 30.67        | 0.8483        | 29.32        | 0.8110        | 29.10        | 0.8705        | 34.48        | 0.9500        |
| CSNLN [22]    | ×3    | 34.74        | 0.9300        | 30.66        | 0.8482        | 29.33        | 0.8105        | 29.13        | 0.8712        | 34.45        | 0.9502        |
| NLSA [21]     | ×3    | 34.85        | 0.9306        | 30.70        | 0.8485        | 29.34        | 0.8117        | 29.25        | 0.8726        | 34.57        | 0.9508        |
| CRAN [33]     | ×3    | 34.80        | 0.9304        | 30.73        | 0.8498        | 29.38        | 0.8124        | 29.33        | 0.8745        | 34.84        | 0.9515        |
| ELAN [29]     | ×3    | 34.90        | 0.9313        | 30.80        | 0.8504        | 29.38        | 0.8124        | 29.32        | 0.8745        | 34.73        | 0.9517        |
| DFSA [17]     | ×3    | 34.92        | 0.9312        | 30.83        | 0.8507        | 29.42        | 0.8128        | 29.44        | 0.8761        | 35.07        | 0.9525        |
| SwinIR [13]   | ×3    | 34.97        | 0.9318        | 30.93        | 0.8534        | 29.46        | 0.8145        | 29.75        | 0.8826        | 35.12        | 0.9537        |
| CAT-A [4]     | ×3    | 35.06        | 0.9326        | 31.04        | 0.8538        | 29.52        | 0.8160        | 30.12        | 0.8862        | 35.38        | 0.9546        |
| DAT-S (ours)  | ×3    | 35.12        | 0.9327        | 31.04        | 0.8543        | 29.51        | 0.8157        | 29.98        | 0.8846        | 35.41        | 0.9546        |
| DAT-2 (ours)  | ×3    | 35.14        | 0.9328        | 31.06        | 0.8547        | 29.53        | 0.8161        | 30.13        | 0.8878        | 35.49        | 0.955         |
| DAT (ours)    | ×3    | 35.16        | 0.9331        | 31.11        | 0.8550        | 29.55        | 0.8169        | 30.18        | 0.8886        | 35.59        | 0.9554        |
| DAT-S+ (ours) | ×3    | 35.16        | 0.9329        | 31.10        | 0.8550        | 29.54        | 0.8161        | 30.10        | 0.8861        | 35.54        | 0.9551        |
| DAT-2+ (ours) | ×3    | <b>35.17</b> | <b>0.9331</b> | <b>31.13</b> | <b>0.8555</b> | <b>29.56</b> | <b>0.8166</b> | <b>30.28</b> | <b>0.8896</b> | <b>35.63</b> | <b>0.9555</b> |
| DAT+ (ours)   | ×3    | <b>35.19</b> | <b>0.9334</b> | <b>31.17</b> | <b>0.8558</b> | <b>29.58</b> | <b>0.8173</b> | <b>30.30</b> | <b>0.8902</b> | <b>35.72</b> | <b>0.9559</b> |
| EDSR [14]     | ×4    | 32.46        | 0.8968        | 28.80        | 0.7876        | 27.71        | 0.7420        | 26.64        | 0.8033        | 31.02        | 0.9148        |
| SRMDNF [27]   | ×4    | 31.96        | 0.8925        | 28.35        | 0.7787        | 27.49        | 0.7337        | 25.68        | 0.7731        | 30.09        | 0.9024        |
| RDN [32]      | ×4    | 32.47        | 0.8990        | 28.81        | 0.7871        | 27.72        | 0.7419        | 26.61        | 0.8028        | 31.00        | 0.9151        |
| OISR [9]      | ×4    | 32.53        | 0.8992        | 28.86        | 0.7878        | 27.75        | 0.7428        | 26.79        | 0.8068        | -            | -             |
| RCAN [30]     | ×4    | 32.63        | 0.9002        | 28.87        | 0.7889        | 27.77        | 0.7436        | 26.82        | 0.8087        | 31.22        | 0.9173        |
| NLRN [15]     | ×3    | 31.92        | 0.8916        | 28.36        | 0.7745        | 27.48        | 0.7306        | 25.79        | 0.7729        | -            | -             |
| RNAN [31]     | ×3    | 32.43        | 0.8977        | 28.83        | 0.7871        | 27.72        | 0.7410        | 26.61        | 0.8023        | 31.09        | 0.9149        |
| SRFBN [12]    | ×4    | 32.47        | 0.8983        | 28.81        | 0.7868        | 27.72        | 0.7409        | 26.60        | 0.8015        | 31.15        | 0.9160        |
| SAN [5]       | ×4    | 32.64        | 0.9003        | 28.92        | 0.7888        | 27.78        | 0.7436        | 26.79        | 0.8068        | 31.18        | 0.9169        |
| RFANet [16]   | ×4    | 32.66        | 0.9004        | 28.88        | 0.7894        | 27.79        | 0.7442        | 26.92        | 0.8112        | 31.41        | 0.918         |
| IGNN [34]     | ×4    | 32.57        | 0.8998        | 28.85        | 0.7891        | 27.77        | 0.7434        | 26.84        | 0.8090        | 31.28        | 0.9182        |
| HAN [23]      | ×4    | 32.64        | 0.9002        | 28.90        | 0.7890        | 27.80        | 0.7442        | 26.85        | 0.8094        | 31.42        | 0.9177        |
| CSNLN [22]    | ×4    | 32.68        | 0.9004        | 28.95        | 0.7888        | 27.80        | 0.7439        | 27.22        | 0.8168        | 31.43        | 0.9201        |
| NLSA [21]     | ×4    | 32.59        | 0.9000        | 28.87        | 0.7891        | 27.78        | 0.7444        | 26.96        | 0.8109        | 31.27        | 0.9184        |
| CRAN [33]     | ×4    | 32.72        | 0.9012        | 29.01        | 0.7918        | 27.86        | 0.7460        | 27.13        | 0.8167        | 31.75        | 0.9219        |
| ELAN [29]     | ×4    | 32.75        | 0.9022        | 28.96        | 0.7914        | 27.83        | 0.7459        | 27.13        | 0.8167        | 31.68        | 0.9226        |
| DFSA [17]     | ×4    | 32.79        | 0.9019        | 29.06        | 0.7922        | 27.87        | 0.7458        | 27.17        | 0.8163        | 31.88        | 0.9266        |
| SwinIR [13]   | ×4    | 32.92        | 0.9044        | 29.09        | 0.7950        | 27.92        | 0.7489        | 27.45        | 0.8254        | 32.03        | 0.9260        |
| CAT-A [4]     | ×4    | 33.08        | 0.9052        | 29.18        | 0.7960        | 27.99        | 0.7510        | 27.89        | 0.8339        | 32.39        | 0.9285        |
| DAT-S (ours)  | ×4    | 33.00        | 0.9047        | 29.20        | 0.7962        | 27.97        | 0.7502        | 27.68        | 0.8300        | 32.33        | 0.9278        |
| DAT-2 (ours)  | ×4    | 33.01        | 0.9047        | 29.21        | 0.7965        | 27.98        | 0.7509        | 27.86        | 0.8341        | 32.41        | 0.9285        |
| DAT (ours)    | ×4    | <b>33.08</b> | <b>0.9055</b> | 29.23        | 0.7973        | 28.00        | 0.7515        | 27.87        | 0.8343        | 32.51        | 0.9291        |
| DAT-S+ (ours) | ×4    | 33.06        | 0.9052        | 29.25        | 0.7968        | 27.99        | 0.7507        | 27.78        | 0.8316        | 32.50        | 0.9289        |
| DAT-2+ (ours) | ×4    | 33.07        | 0.9053        | <b>29.26</b> | <b>0.7973</b> | <b>28.01</b> | <b>0.7515</b> | <b>27.97</b> | <b>0.8358</b> | <b>32.60</b> | <b>0.9296</b> |
| DAT+ (ours)   | ×4    | <b>33.15</b> | <b>0.9062</b> | <b>29.29</b> | <b>0.7983</b> | <b>28.03</b> | <b>0.7518</b> | <b>27.99</b> | <b>0.8365</b> | <b>32.67</b> | <b>0.9301</b> |

Table 6: Quantitative comparison with state-of-the-art methods. The best and second-best results are coloured red and blue.

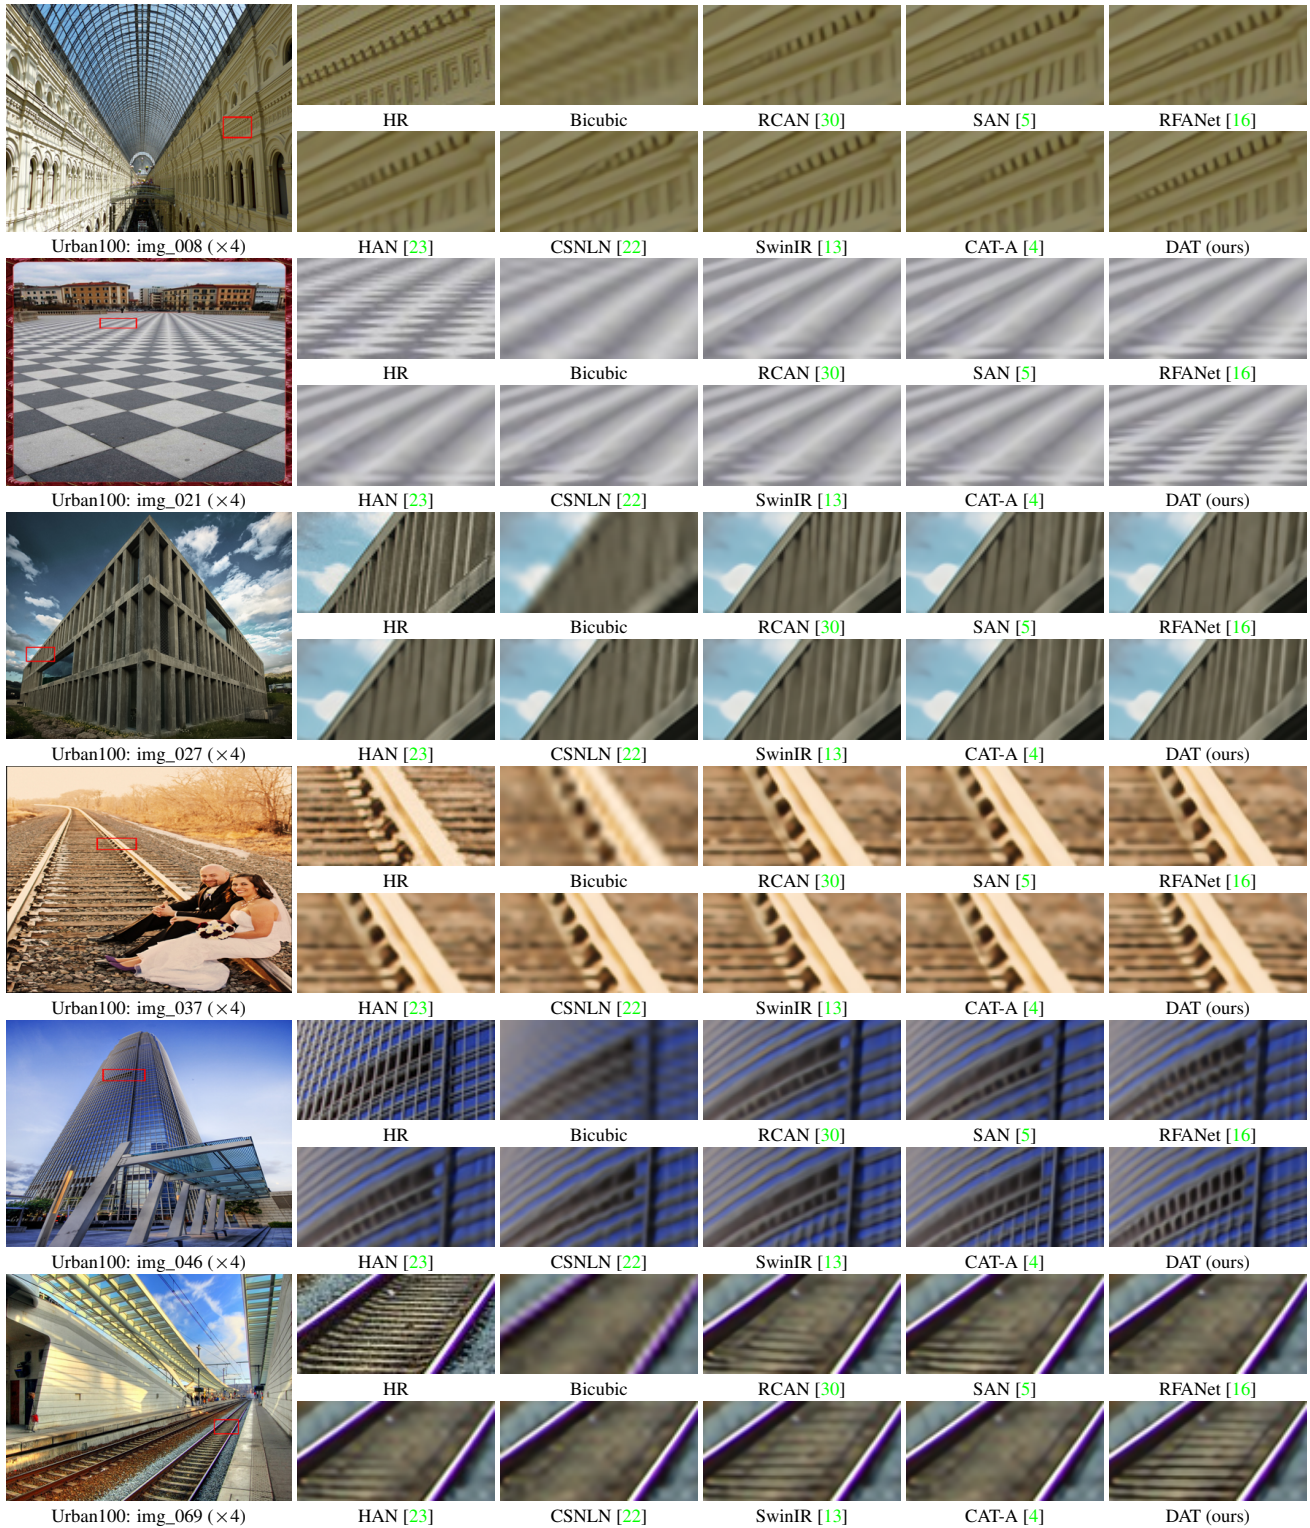

Figure 4: Visual comparison for image SR ( $\times 4$ ) in some challenging cases.



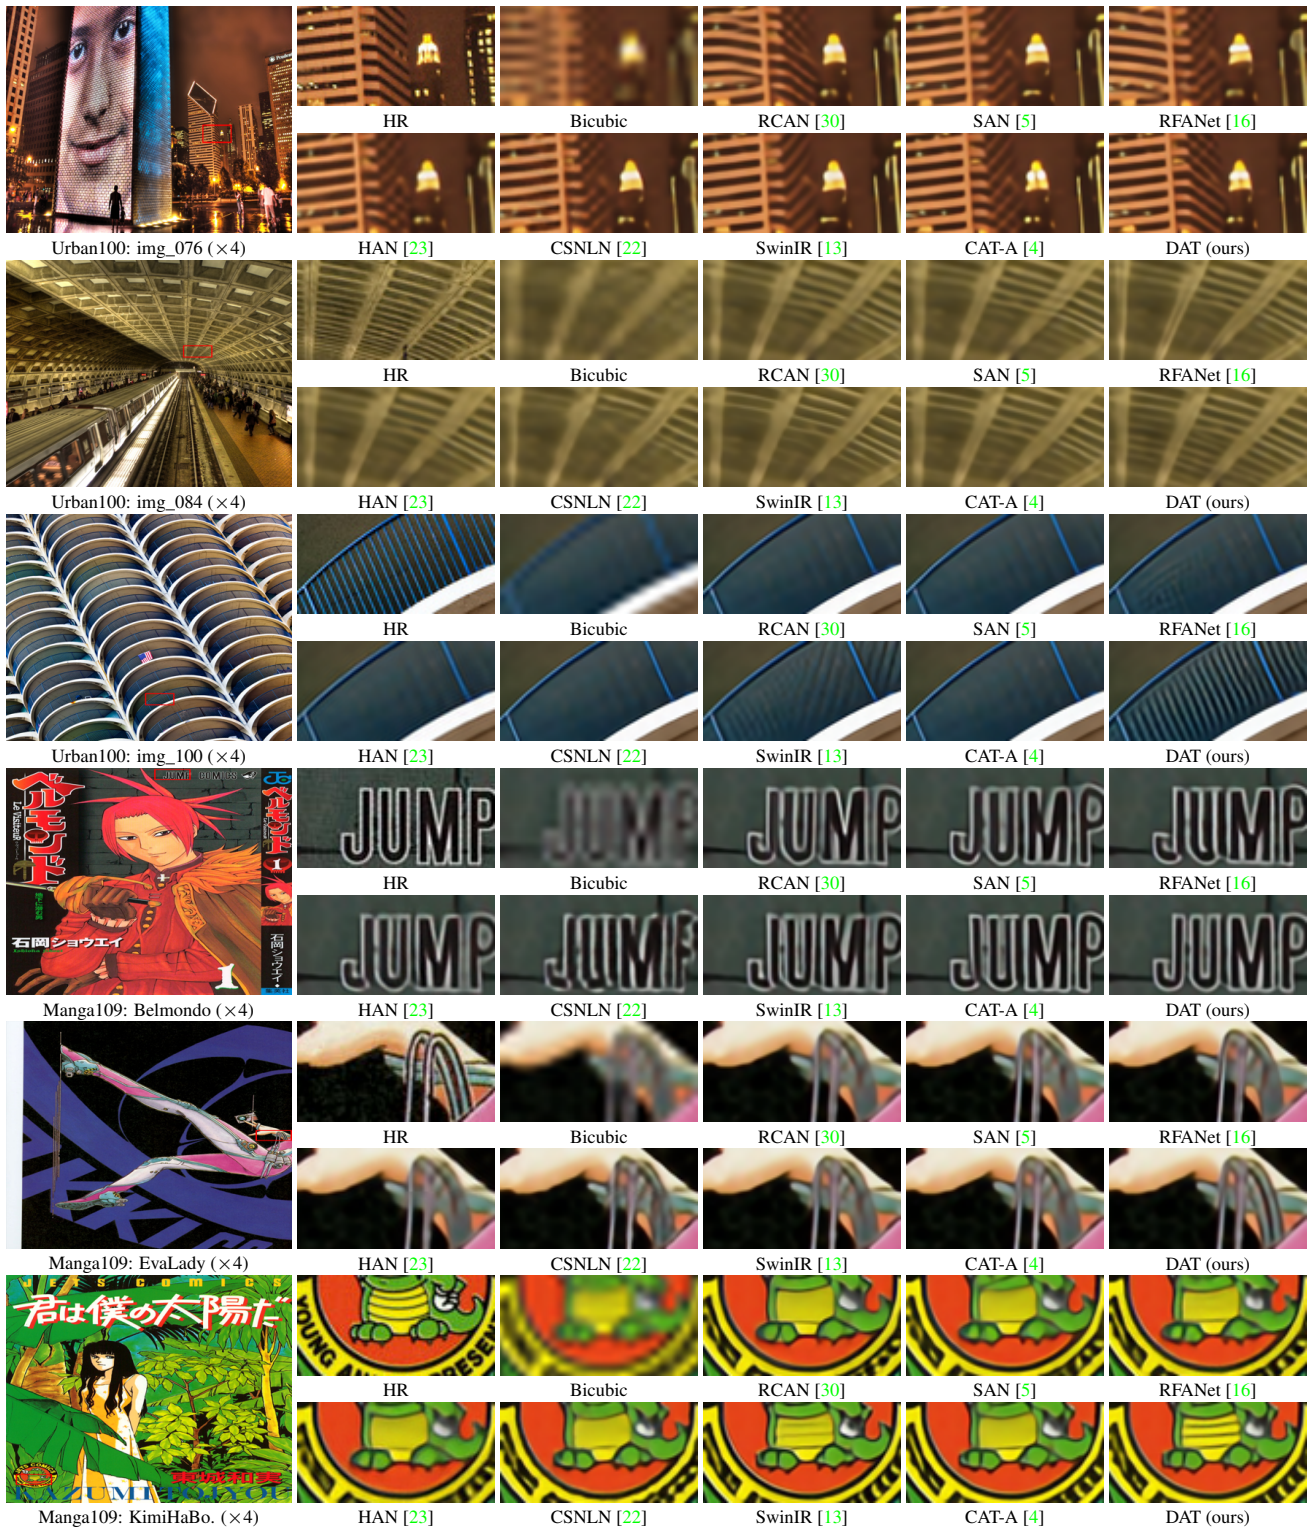

Figure 5: Visual comparison for image SR ( $\times 4$ ) in some challenging cases.
